# Supplementary material
Source: PubMed Central journal article supplement (PMC4172558)
Supplement: Supp_Fig1.pdf [file Supp_Fig1.pdf]

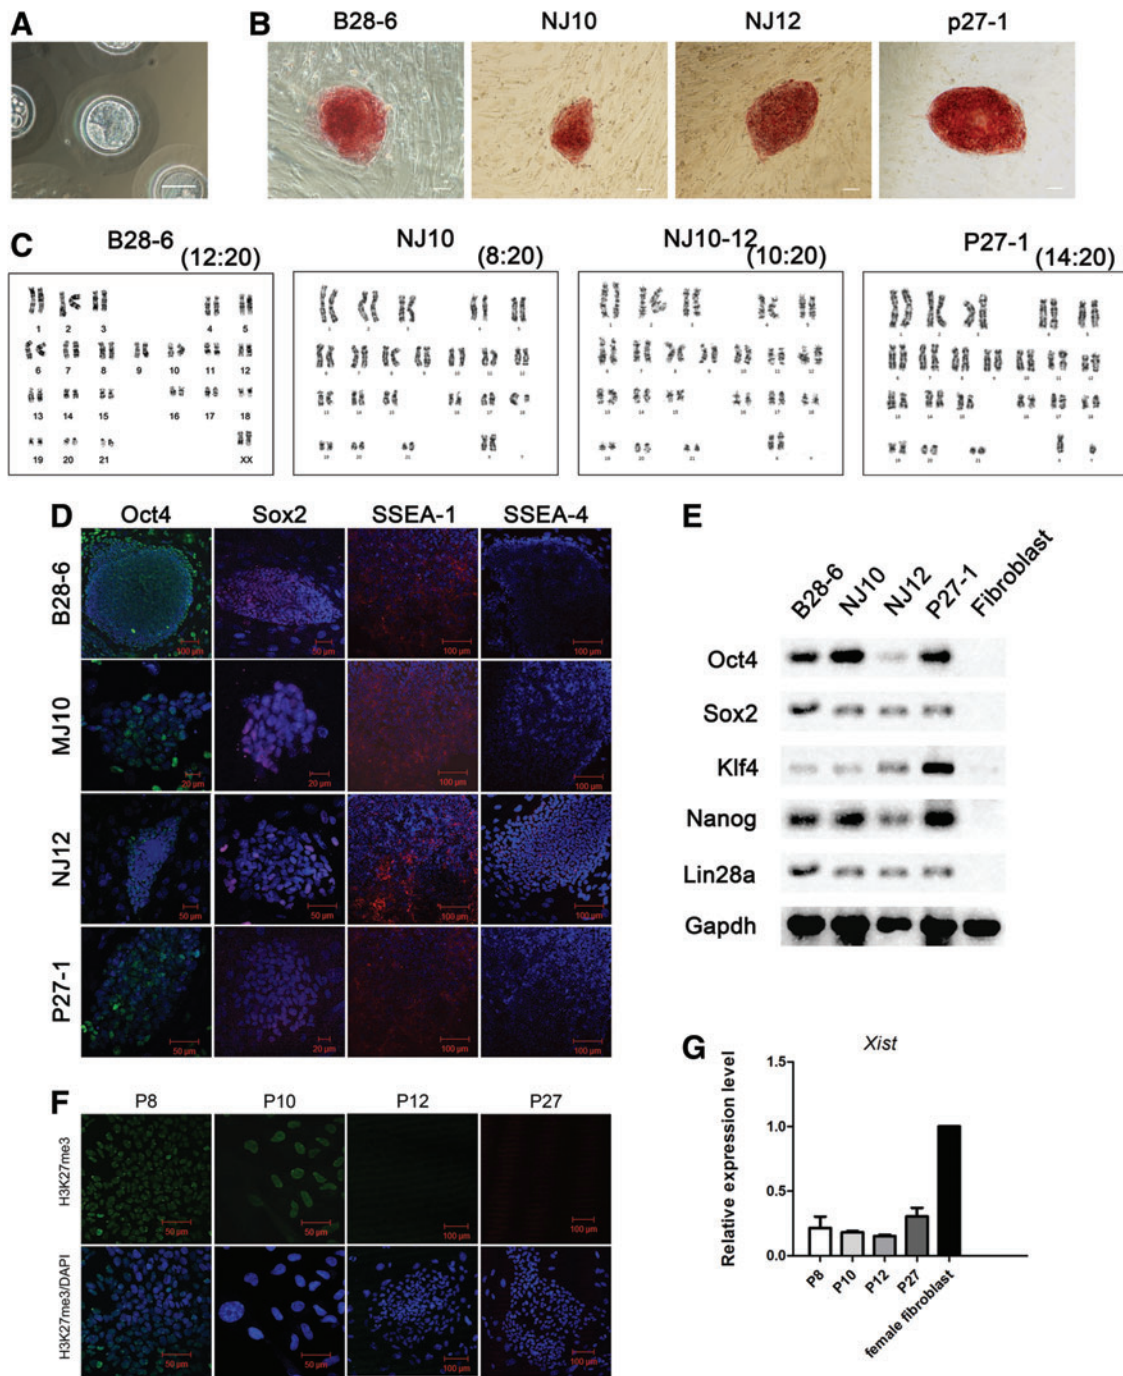

**SUPPLEMENTARY FIG. S1.** Characterization of rabbit embryonic stem cells (rbESCs). **(A)** Rabbit blastocysts. **(B)** Alkaline phosphatase staining. **(C)** Karyotype: the number at the *top-right corner* means the ration of euploid: mitosis count. **(D)** Immunofluorescent staining for pluripotency markers. **(E)** Polymerase chain reaction (PCR) analysis for pluripotency gene expression of the primed rbESC lines. **(F)** Immunofluorescent staining for H3K27me3 for different passages of NJ10. **(G)** qRT-PCR analysis of *Xist* expression in NJ10 rbESCs at different passages.
