# Supplementary material
Source: PubMed Central journal article supplement (PMC4172558)
Supplement: Supp_Fig2.pdf [file Supp_Fig2.pdf]

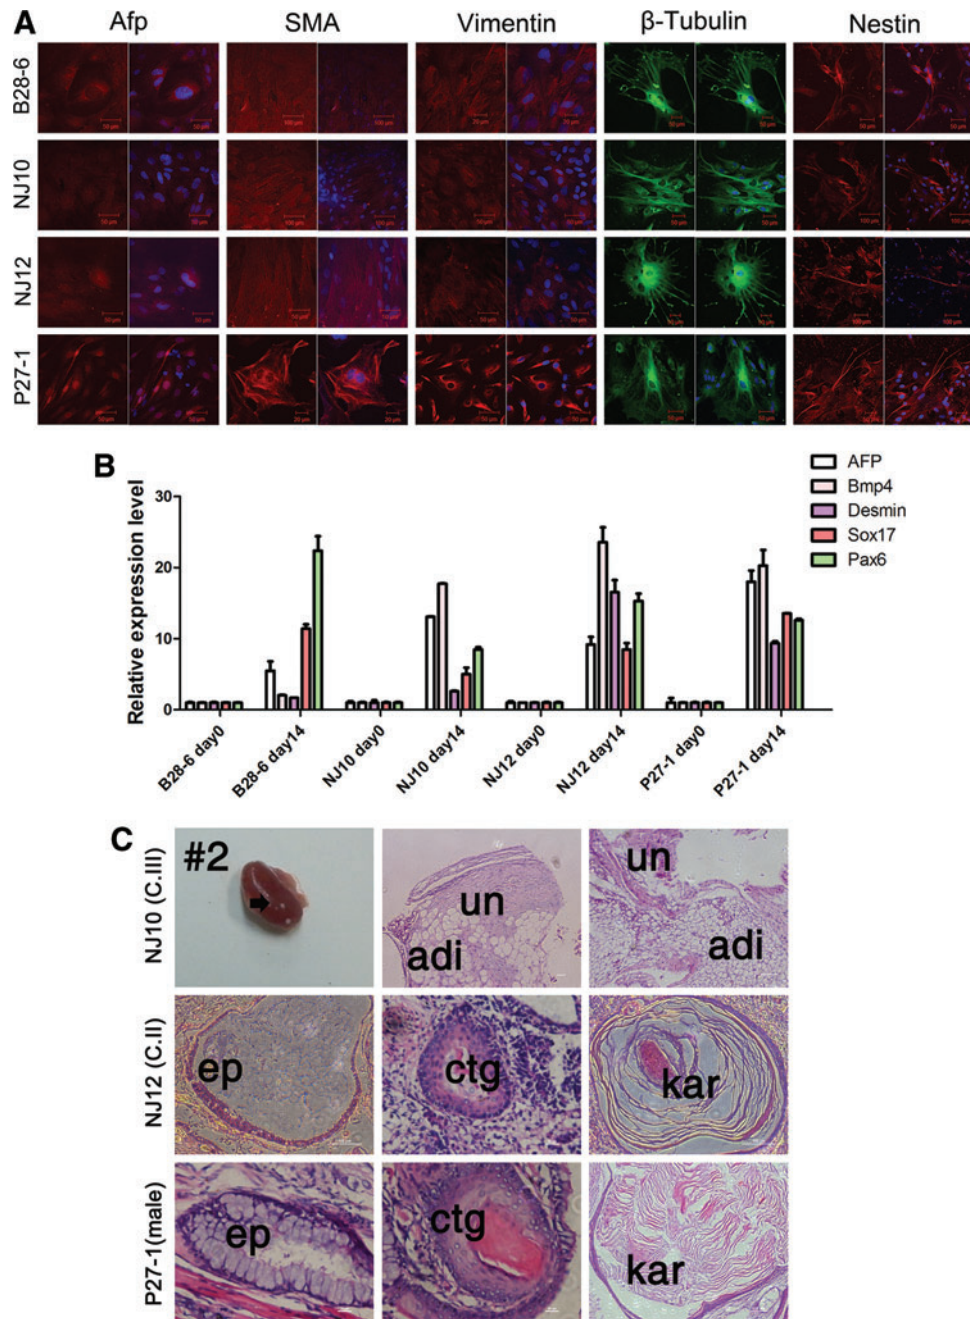

**SUPPLEMENTARY FIG. S2.** Class II and class III rbESCs exhibited significant different in vivo differentiation abilities. (A) Immunofluorescent staining for different germ layer markers AFP (endoderm), SMA, Vimentin (mesoderm), and  $\beta$ -Tubulin (ectoderm). (B) qRT-PCR for different germ layer markers. AFP (endoderm), Bmp4 (mesoderm), Desmin (mesoderm), Sox17, and Pax6 (ectoderm). (C) Teratoma formation from class II and class III rbESCs. un (undifferentiated tissue), ctg (cartilage), ep (epithelium) and kar (keratinocyte).
