# Supplementary material
Source: PubMed Central journal article supplement (PMC4172558)
Supplement: Supp_Table1.pdf [file Supp_Table1.pdf]

## Supplementary Data

SUPPLEMENTARY TABLE S1. DOUBLING TIME  
OF FEMALE RBESCS

| <i>ESC lines</i>        | <i>Doubling time (hours)</i> |
|-------------------------|------------------------------|
| NJ10 (P10, primed)      | 99.45                        |
| NJ12 (P8, primed)       | 63.03                        |
| NJ10-N1 (P8, mESC-like) | 29.34                        |
| NJ10-N3 (P8, mESC-like) | 39.18                        |
| R1 (P23, mESC)          | 29.98                        |
| H9 (P47, hESC)          | 64.01                        |

NJ10 and NJ12 were female rbESCs; NJ10-N1 and N3 were mESC-like rbESCs converted from NJ10 by 4 transcription factors. R1 (mESCs) and H9 (hESCs) were used as controls. rbESCs, rabbit embryonic stem cells.
