# Supplementary material
Source: PubMed Central journal article supplement (PMC4172558)
Supplement: Supp_Table2.pdf [file Supp_Table2.pdf]

SUPPLEMENTARY TABLE S2. COLONY FORMING EFFICIENCIES

| <i>ESC lines</i>        | <i>24 h (%)</i> | <i>48 h (%)</i> |
|-------------------------|-----------------|-----------------|
| NJ10 (P10, primed)      | 0.12±0.03       | 0.39±0.12       |
| NJ10-N1 (P8, mESC-like) | 19.09±2.2       | 23.14±2.62      |
| NJ10-N3 (P8, mESC-like) | 19.34±3.12      | 29.12±1.74      |
| R1 (P23, mESC)          | 32.08±4.32      | 41.18±2.09      |
| H9 (P47, hESC)          | 0.14±0.07       | 0.45±0.06       |

Data are shown as the ratio of AP-positive colonies to the number of cells initially seeded at 24 and 48 h (mean±SD). NJ10 was primed rbESCs; NJ10-N1 and N3 were mESC-like rbESCs converted from NJ10 by 4 transcription factors. R1 (mESCs) and H9 (hESCs) were used as controls.

rbESCs, rabbit embryonic stem cells.
