# Supplementary material
Source: PubMed Central journal article supplement (PMC4172558)
Supplement: Supp_Table3.pdf [file Supp_Table3.pdf]

SUPPLEMENTARY TABLE S3. POLYMERASE CHAIN REACTION PRIMERS

| <i>Gene name</i>        | <i>Forward (5' to 3')</i>   | <i>Reverse (5' to 3')</i>  | <i>Applications</i>            |
|-------------------------|-----------------------------|----------------------------|--------------------------------|
| <i>OCT4</i>             | AGGCCGGAAAGAAAAGCGAAC       | CCAGAGCAGGGACAGGCACAGA     | RT-PCR                         |
| <i>SOX2</i>             | TTTTGTGGAGACGGAGAAGCG       | GGAGGAAGAGGTAACCCAGGGG     |                                |
| <i>KLF4</i>             | ACAACCCGGCCCTCCTAGCC        | GAAGCTGACGCCGAGGTGGT       | Real-time PCR                  |
| <i>c-MYC</i>            | CGACCCGGACGACGAGACCT        | TCTTCTCAGATCCGCTGCTGGTG    |                                |
| <i>NANOG</i>            | C'TTGCAACTGCCATGTGCCAG      | CAGGGCCTGAGCCCTCTGAGTCA    |                                |
| <i>Lin28</i>            | TGTCCAACAGCAGTTTGCAG        | GACAGGAAGCCGAACCCCA        |                                |
| <i>Gapdh</i>            | AAGGCGGAGCCAAAAGGTCA        | CAGCATCGAAGGTAGAGGAGTG     |                                |
| <i>LNXC (Transgene)</i> | AGCTCGTTTAGTGAACCGTCAGATC   |                            |                                |
| <i>OCT4</i>             | AGAAAGACGTGGTCCGTGTGTGG     | CCAGAGGAAAAGACATAGGCCCCC   |                                |
| <i>SOX2</i>             | GATGCAGCCCATGCACCCGCTA      | TGCCCTGTGGAGTAGGACA        |                                |
| <i>NANOG</i>            | GTCCAGCAAGTCTACAGCCCTCA     | AGCGGAGAGGGGTGTCTGTAA      |                                |
| <i>Gapdh</i>            | CCGTGCTGTCCGCCGTTCCGAC      | GCGGCCAAATCCGTTCACCTCCG    |                                |
| <i>Bmp4</i>             | AAAGTCGCCGAGATTCAGG         | GAGTCTGATGGAGGTGAGT        |                                |
| <i>Desmin</i>           | AGCAGGAGATGATGGAATAC        | TCCAGCAGCTTCCGGTAG3G       |                                |
| <i>Sox17</i>            | TACGCCAGTGACGACCAGAG        | ACTCGCCCTTGGCTCGG          |                                |
| <i>Pax6</i>             | ATCCCGGACTTCGGTGCCA         | GAGGAAACAGGGTGGTGGGG       |                                |
| <i>MAGEA2</i>           | CCACCACCTCAAATAAAGTGT       | CTCACTAAAGATCAGAGGGTA      |                                |
| <i>RAB6B</i>            | ACATTGAGCACATGTATCTCCG      | CCAATGTTTGAACGTGTTTCC      |                                |
| <i>CHP2</i>             | GGGACAGTATCCGGCCGAGAG       | GATCCATGGGGTCCAGGTAG       |                                |
| <i>AIF</i>              | ACCAGGGATTTACAGGGAGGAA      | CCAGTTTGGAGGGCAGATCC       |                                |
| <i>KLF2</i>             | ACTTTCGCCAGCCCGTG           | CCCATGGACAGGATGAAATCC      |                                |
| <i>STAT3</i>            | ATCAGCTCCAGCACTCGAC         | ACCTGCTCTGAAAGGAATGC       |                                |
| <i>Socs3</i>            | CGAAGGCTCCTTGTGGACT         | GGTCCCGAATCGAAGTCTCC       |                                |
| <i>Gbx2</i>             | CTGATGATGATGCAGCGCC         | GCACCAACCGCCGGTA           |                                |
| <i>Otx2</i>             | GAATGGATTTGCTGCACCCC        | GGGCAGGTTGATTTTCAGCC       |                                |
| <i>Cre1</i>             | GGCACCACTTCATGTTACAGAAAG    | CAITTTCCCAAAGCAGAGGTTGTTCC |                                |
| <i>Xist</i>             | GGATAGCTGAATGTGTAATTTTGTGTC | GAAATAAAGCGTGAAGAAGAGCC    | qRT-PCR, RNA-FISH<br>Bisulfite |
| <i>Xist</i> promote in  | GGTTTAGAAATGAAGTTTATTTTAG   | CTAAAAAAAACCCCAATACAAAAAAA |                                |
| <i>Xist</i> promote out | TAGATGAGAATTGGAAAATT        | TATCAAAAAAACAACACTAAAAAAA  |                                |

qRT-PCR, quantitative reverse transcription-polymerase chain reaction.
